# Supplementary material
Source: PubMed Central journal article supplement (PMC3865360)
Supplement: mmc1.pdf [file mmc1.pdf]

## Supplementary Table 1

Sample list.

| Species                             | SampleID | Origin              | Photo                                                                                 | Voucher                     |
|-------------------------------------|----------|---------------------|---------------------------------------------------------------------------------------|-----------------------------|
| <b>Ingroup</b>                      |          |                     |                                                                                       |                             |
| <i>Greenwoodochromis bellcrossi</i> | 13429    | Aquarium trade      |    |                             |
| <i>Greenwoodochromis christyi</i>   | 13430    | Aquarium trade      |    |                             |
|                                     | 13367    | Mpulungu fishmarket |                                                                                       |                             |
|                                     | 13390    | Mpulungu fishmarket |   | voucher in Graz (T03 3/B8)  |
|                                     | 13399    | Mpulungu fishmarket |                                                                                       |                             |
| <i>Limnochromis staneri</i>         | 12951    | Mpulungu fishmarket |  | voucher in Graz (T03 5/J10) |

|                                    |       |                     |                                                                                       |                                |
|------------------------------------|-------|---------------------|---------------------------------------------------------------------------------------|--------------------------------|
|                                    | 13365 | Mpulungu fishmarket |    |                                |
|                                    | 13366 | Mpulungu fishmarket |    |                                |
| <i>Limnochromis abeelei</i>        | 12943 | Mpulungu fishmarket |                                                                                       |                                |
|                                    | 13369 | Mpulungu fishmarket |    |                                |
| <i>Gnathochromis permaxillaris</i> | 13483 | Mpulungu fishmarket |                                                                                       |                                |
|                                    | 13364 | Mpulungu fishmarket |   |                                |
| <i>Limnochromis auritus</i>        | 13467 | Aquarium trade      |                                                                                       | voucher in Graz (T01 7/H9)     |
|                                    | 12953 | Mbita (west)        |  | voucher in Mpulungu (T03 6/A3) |

|                                     |       |                     |                                                                                       |                             |
|-------------------------------------|-------|---------------------|---------------------------------------------------------------------------------------|-----------------------------|
|                                     | 13373 | Mpulungu fishmarket |    |                             |
| <i>Baileychromis centropomoides</i> | 13473 | Chituta Bay         |                                                                                       |                             |
|                                     | 12961 | Mpulungu fishmarket |    |                             |
|                                     | 12962 | Mpulungu fishmarket |                                                                                       |                             |
|                                     | 13417 | Mpulungu fishmarket |    |                             |
|                                     | 13418 | Mpulungu fishmarket |                                                                                       |                             |
|                                     | 13419 | Mpulungu fishmarket |                                                                                       |                             |
| <i>Reganochromis calliurus</i>      | 13420 | Mpulungu fishmarket |                                                                                       | voucher in Graz (T06 10/A2) |
|                                     | 13362 | Aquarium trade      |    |                             |
|                                     | 13484 | Aquarium trade      |                                                                                       | voucher in Graz (T10 10/A6) |
| <i>Triglachromis otostigma</i>      | 13485 | Aquarium trade      |                                                                                       |                             |
|                                     | 13359 | Aquarium trade      |                                                                                       | voucher in Graz (T09 20/H6) |
|                                     | 13360 | Aquarium trade      |                                                                                       | voucher in Graz (T09 20/H7) |
|                                     | 13371 | Mpulungu fishmarket |  |                             |

|                                     |         |                     |                                                                                     |                          |
|-------------------------------------|---------|---------------------|-------------------------------------------------------------------------------------|--------------------------|
|                                     | 13372   | Mpulungu fishmarket |  |                          |
|                                     | 13434   | Aquarium trade      |  | voucher in Graz (KS4 H6) |
|                                     | 13435   | Aquarium trade      |                                                                                     |                          |
| <b>Outgroup</b>                     |         |                     |                                                                                     |                          |
| <i>Xenotilapia ochrogenys</i>       | 13052   | Aquarium trade      |                                                                                     |                          |
|                                     | 13051   | Aquarium trade      |                                                                                     |                          |
| <i>Cyprichromis leptosoma</i>       | 12981   | Kasenga Rocks       |                                                                                     |                          |
| <i>Cyprichromis microlepidotus</i>  | 12988   | Aquarium trade      |                                                                                     |                          |
| <i>Paracyprichromis nigripinnis</i> | 13091   | Aquarium trade      |                                                                                     |                          |
| <i>Benthochromis tricoti</i>        | 13358   | Kalambo Lodge       |                                                                                     |                          |
| <i>Benthochromis melanoides</i>     | 13357   | Sumbu (north)       |                                                                                     |                          |
| <i>Perissodus microlepis</i>        | 13356   | Kalambo Lodge       |                                                                                     |                          |
|                                     | T0631F5 | Mbita (east)        |                                                                                     |                          |
| <i>Haplotaxodon microlepis</i>      | 13438   | Lufubu estuary      |                                                                                     |                          |
| <i>Ctenochromis benthicola</i>      | 13437   | Aquarium trade      |                                                                                     |                          |
|                                     | 13436   | Aquarium trade      |                                                                                     |                          |
| <i>Cyphotilapia frontosa</i>        | 13439   | Lufubu estuary      |                                                                                     |                          |
|                                     | 13440   | Lufubu estuary      |                                                                                     |                          |
| <i>Tropheus smoorii</i>             | KS4F10  | Murago              |                                                                                     |                          |
|                                     | KS4C1   | Murago              |                                                                                     |                          |
| <i>Tropheus duboisi</i>             | 13361   | Aquarium trade      |                                                                                     |                          |

Coordinates: Chituta Bay, 8°45' S, 31°10' E; Kalambo Lodge, 8°37' S, 31°37' E; Kasenga Rocks, 8°44' S, 31°09' E; Lufubu estuary, 8°32' S, 30°44' E; Mbita (east), 8°45' S, 31°06' E; Mbita (west), 8°45' S, 31°05' E; Murago, 7°05' S, 29°50' E; Sumbu (north), 8°31' S, 30°28' E.

Note that fish obtained at the fishmarket in Mpulungu might have been caught anywhere in southern Lake Tanganyika.
